# Supplementary material for: A novel polysaccharide obtained from Siraitia grosvenorii alleviates inflammatory responses in a diabetic nephropathy mouse model via the TLR4-NF-κB pathway
Source: Royal Society of Chemistry journal article supplement (doi:10.1039/d1fo01182k), 2021-01-01
Supplement: d1fo01182k1.pdf [file d1fo01182k1.pdf]

## Supplementary materials

Table S1 UPLC conditions

| Injection time (min) | Liquid A: 95% deionised water + 5% acetonitrile + 0.1% formic acid (%) | Liquid B: acetonitrile + 0.1% formic acid (%) | Injection volume (µL) | Setting flow rate (mL/min) |
|----------------------|------------------------------------------------------------------------|-----------------------------------------------|-----------------------|----------------------------|
| 0                    | 100                                                                    | 0                                             | 5                     | 0.2                        |
| 2                    | 100                                                                    | 0                                             | 5                     | 0.2                        |
| 3                    | 90                                                                     | 10                                            | 5                     | 0.2                        |
| 5                    | 60                                                                     | 40                                            | 5                     | 0.2                        |
| 10                   | 10                                                                     | 90                                            | 5                     | 0.2                        |
| 24                   | 1                                                                      | 99                                            | 5                     | 0.2                        |
| 27                   | 1                                                                      | 99                                            | 5                     | 0.2                        |
| 28                   | 100                                                                    | 0                                             | 5                     | 0.2                        |
| 30                   | 100                                                                    | 0                                             | 5                     | 0.2                        |

Table S2. MS conditions

| Ion source              | Desolventizing gas flow rate (L/h) | Desolventizing gas temperature (°C) | Cone hole air flow (L/h) | Ion source temperature (°C) | Capillary voltage (V) | Tapere d hole voltage (V) |
|-------------------------|------------------------------------|-------------------------------------|--------------------------|-----------------------------|-----------------------|---------------------------|
| Temperature and voltage | 40                                 | 300                                 | 53                       | 120                         | 4000V(+)<br>2800V(-)  | 35                        |

Table S3 Primer synthesis sequences

| Primer name             | Sequence (5' to 3')  | Number of bases |
|-------------------------|----------------------|-----------------|
| NF-KB <sub>p65</sub> -F | CATCGAACAGCCGAAGCAAC | 20              |
| NF-KB <sub>p65</sub> -R | TCCTGGTCCTGTGTAGCCAT | 20              |
| TLR <sub>4</sub> -F     | GCTGGTTTACACGTCCATCG | 20              |
| TLR <sub>4</sub> -R     | ACACCTGCCAGAGACATTGC | 20              |
| GAPDH-F                 | GAAGGTGAAGGTCGGAGTCA | 20              |
| GAPDH-R                 | TTGAGGTCAATGAAGGGGTC | 20              |
